# Supplementary material for: Systematic pan-cancer analysis identifies cuproptosis-related gene DLAT as an immunological and prognostic biomarker
Source: publisher site journal article supplement (doi:10.18632/aging.204728), 2023-05-17
Supplement: Supplementary file [file aging-v15i10-204728-supplementary-material-SD1.pdf]

## SUPPLEMENTARY FIGURES

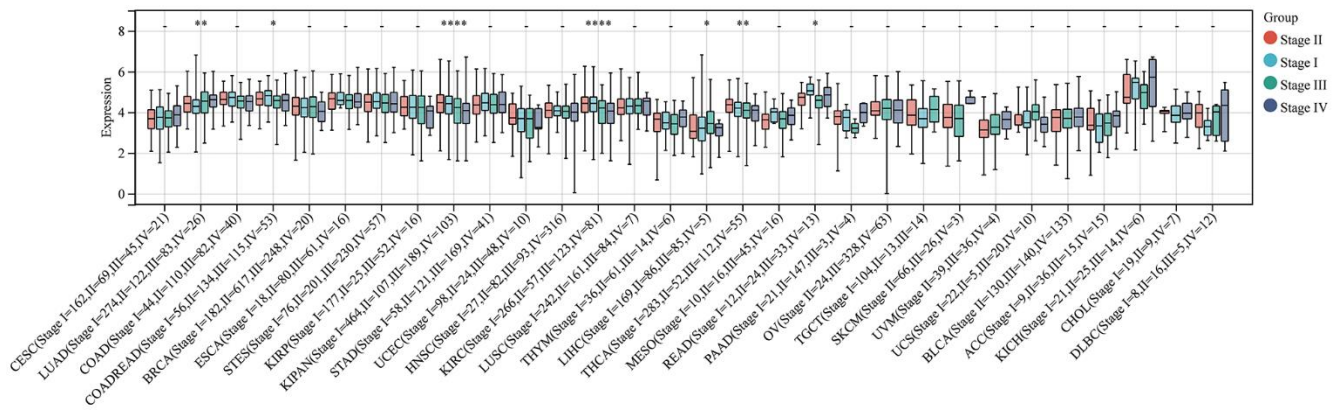

**Supplementary Figure 1. Pan-cancer DLAT expression in different stages.** -, not significant, \* $p < 0.05$ , \*\* $p < 0.01$ , \*\*\* $p < 0.001$  and \*\*\*\* $p < 0.0001$ .

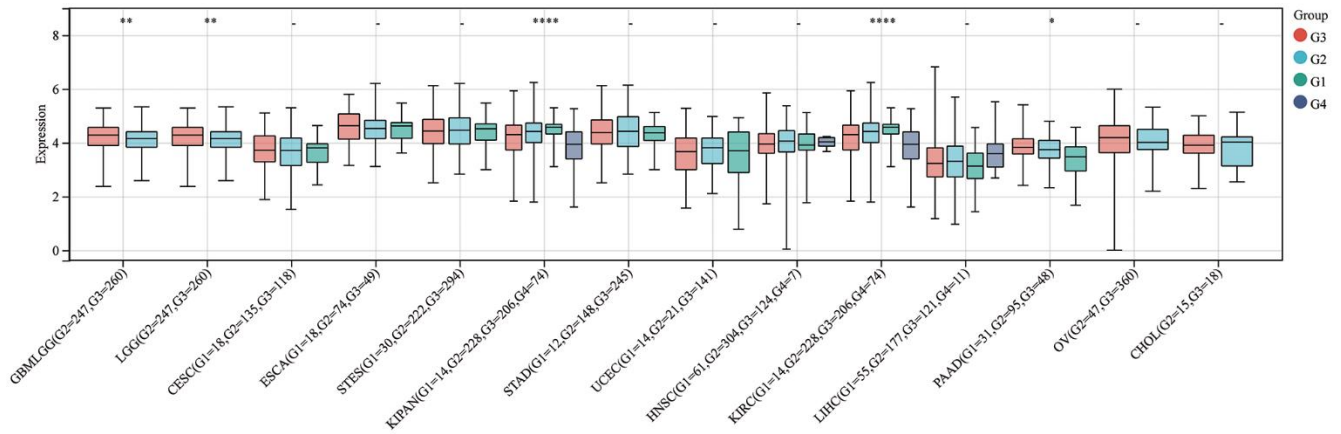

**Supplementary Figure 2. Pan-cancer DLAT expression in different grades.** -, not significant, \* $p < 0.05$ , \*\* $p < 0.01$ , \*\*\* $p < 0.001$  and \*\*\*\* $p < 0.0001$ .
